# Supplementary material
Source: PubMed Central journal article supplement (PMC8818019)
Supplement: NIHMS1751358-supplement-1.pdf [file NIHMS1751358-supplement-1.pdf]

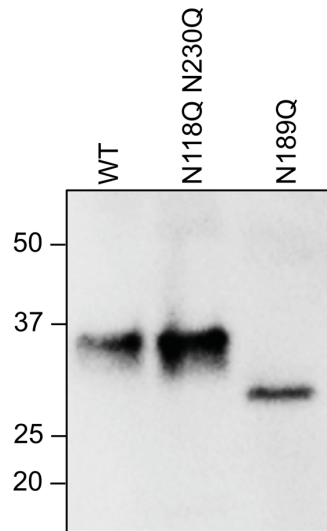

**Figure S1. Tspan15 contains a single glycosylation site, related to Figure 1.** Tspan15 contains three predicted N-linked glycosylation sites. Wild-type FLAG-tagged Tspan15 and predicted glycosylation site mutants were expressed in Expi293 cells. The anti-FLAG western blot shows that there is no change in migration on the gel with the N118Q/N230Q double mutant compared to wild-type Tspan15. The N189Q mutant has a clear change in migration position with a sharpened band due to loss of the glycan.

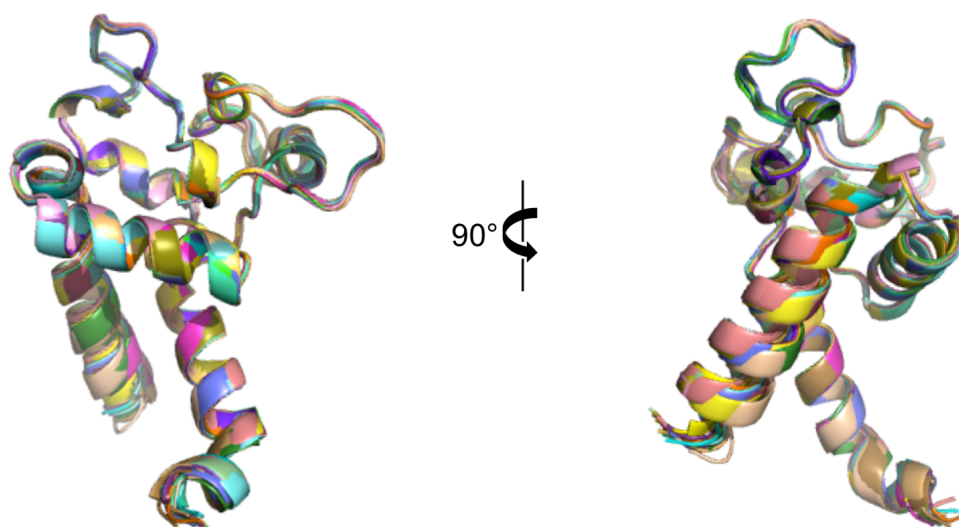

**Figure S2. Alignment of all 24 copies of Tspan15 LEL in the asymmetric unit, related to Figure 1.** Each copy of Tspan15 LEL is aligned and displayed in cartoon representation in a different color.

A

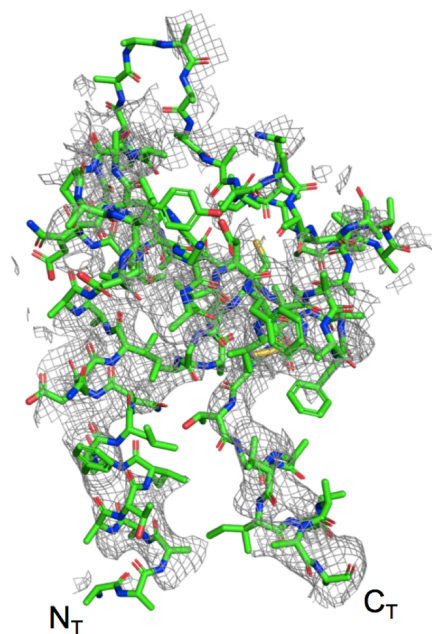

B

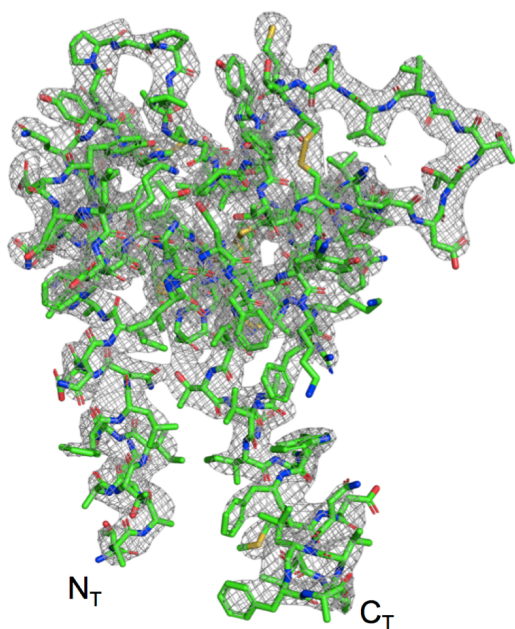

C

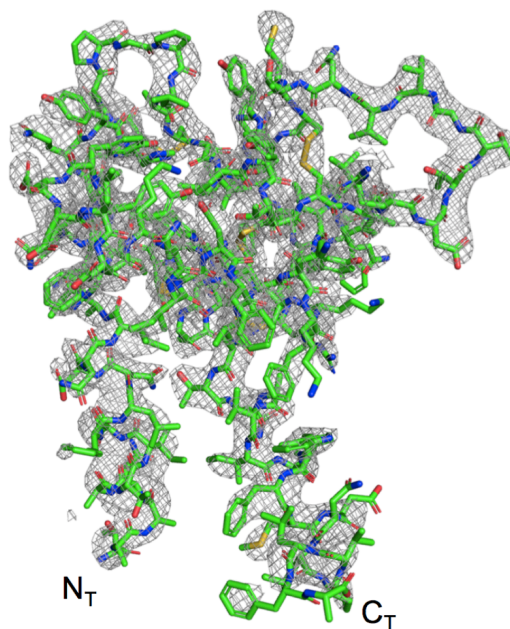

**Figure S3. Representative electron density maps, related to Figure 1.** (A) Simulated-annealing composite omit 2mFo-Fc map following molecular replacement with partial model (with 13 of 24 chains placed) and rigid body refinement contoured to 1.0  $\sigma$ . (B) The final refined 2mFo-DFc map and (C) simulated-annealing composite omit 2mFo-Fc map, both contoured to 1.5  $\sigma$ .

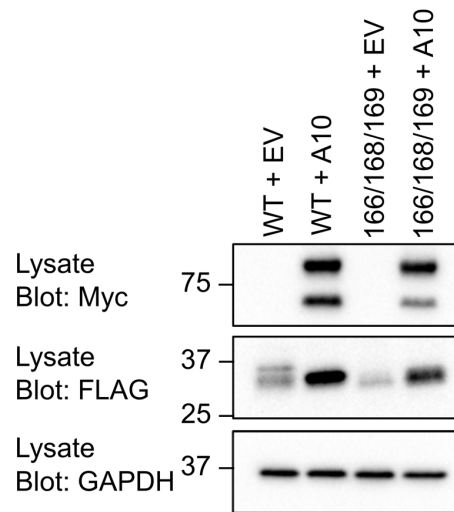

**Figure S4. Tspan15 protein amount is increased by co-expression with ADAM10, related to Figure 4.** HEK293T cells were co-transfected with FLAG-tagged Tspan15 or Tspan15 166/168/169 mutant and either myc-ADAM10 or empty vector. Western blots show increased abundance of both wild-type and mutant Tspan15 proteins when co-expressed with ADAM10.

|         |                                                                       |     |
|---------|-----------------------------------------------------------------------|-----|
| Tspan15 | TFRNQTI DFLNDNI RRG IENYYDD LDFKN IMD FVQKKFK CCGGEDYRDW SKNQYHDC SA- | 173 |
| Tspan5  | VFKDWIKDQLYFFINNNIRAYRDDIDLQNLIDFTQEYWQCCGAFGADDWNLNIYFNCTDS          | 171 |
| Tspan10 | -LWGPLQDSLEHTLRVAIAHYQDDPDLRFLLDQVQLGLRCCGAASYQDWQONLYFNCS-           | 231 |
| Tspan14 | LFQDWVRDRFREFFESNIKSYRDDIDLQNLIDSLQKANQCCGAYGPEDWDLNVYFNCSGA          | 173 |
| Tspan17 | VFKDWIRDQLNLFINNNVKAYRDDIDLQNLIDFAQEYWSCCGARGPNDWNLNIYFNCTDL          | 175 |
| Tspan33 | VFSKARGKGVSEIINNAIVHYRDDLDLQNLIDFGQKKFSCCGGISYKDWSONMYFNCS            | 176 |
|         |                                                                       |     |
| Tspan15 | -PGPLACGV PYTCC IRN--TTEVVNTMCGYKTIDKERFSVQDVIYVRGCTNAVI IWFMDN       | 230 |
| Tspan5  | NASRERCGVPFSCCTKD-PAEDVINTQCGYDARQKPEVDQQIVITYTKGCVQFEKWLQDN          | 232 |
| Tspan10 | -PGVQACSLPASCCIDPREDGASVNDQCGFGVLRLDADAAQRVVYLEGCGPPLRRWLRAN          | 290 |
| Tspan14 | SYSREKCGVPFSCCVPD-PAQKVVNTQCGYDVRIQLKSKWDESI FTKGCIQALESWLPRN         | 232 |
| Tspan17 | NPSRERCGVPFSCCVRD-PAEDVLNTQCGYDVRLKLELEQQGFHTKGCVGQFEKWLQDN           | 234 |
| Tspan33 | NPSRERCSVPYSCCLPT-PDQAVINTMCGQGMQAFDYLEASKVIYTNGCIDKLVNWIHSN          | 235 |

- N-linked glycosylation site
- Disulfide forming cysteine
- 80% conserved in human TspanC8
- 100% conserved in human TspanC8

**Figure S5. Sequence alignment of the LEL domain of human TspanC8 proteins, related to Figures 4 and 5.** Alignment of the six human TspanC8 LEL domain sequences. Conserved TspanC8 cysteines are colored in yellow, N-linked glycosylation sites are blue, sites that are 100% conserved in the human TspanC8 proteins are red and sites that are at least 80% conserved (including conservative substitutions) are green.
